# Supplementary material for: Yeast—As Bioremediator of Silver-Containing Synthetic Effluents
Source: MDPI journal article supplement (doi:10.3390/bioengineering10040398), 2023-03-23
Supplement: s1 [file s1]

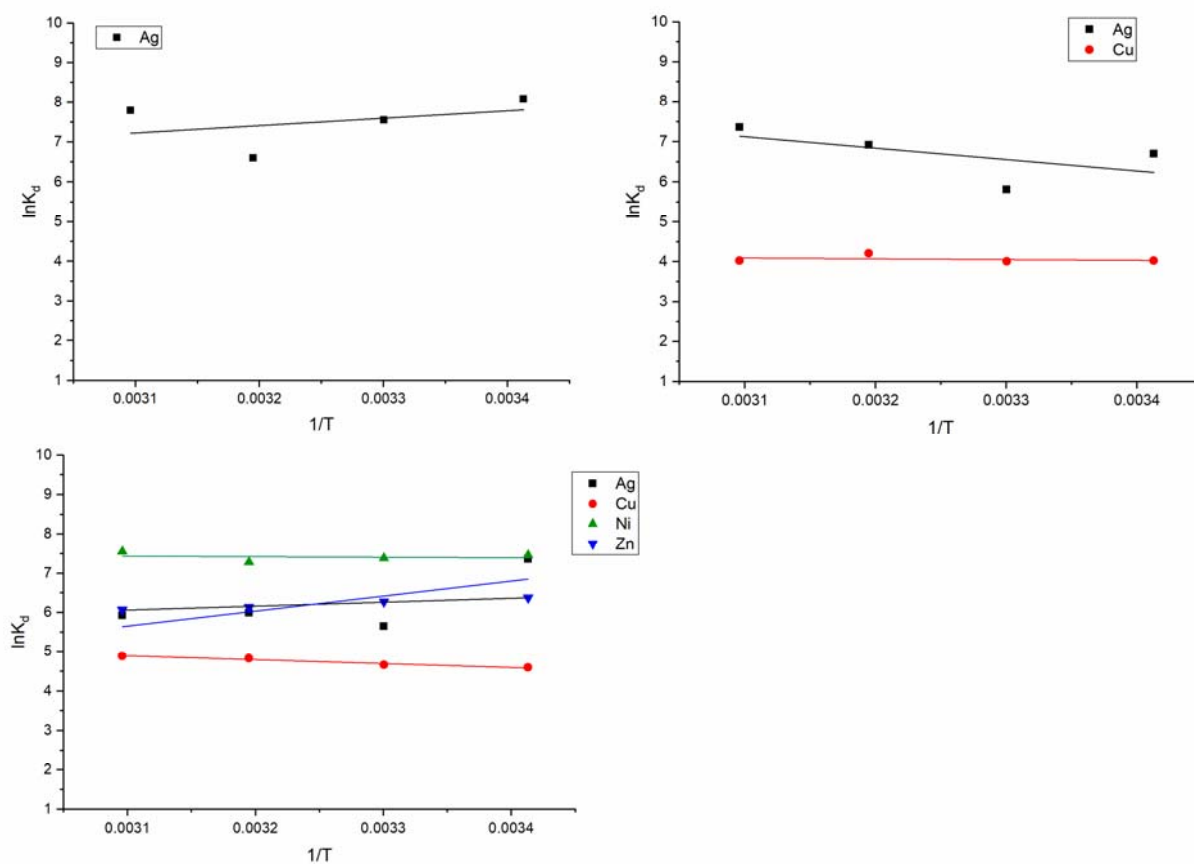

Figure S1: Plot of  $\ln K_d$  versus  $1/T$ .

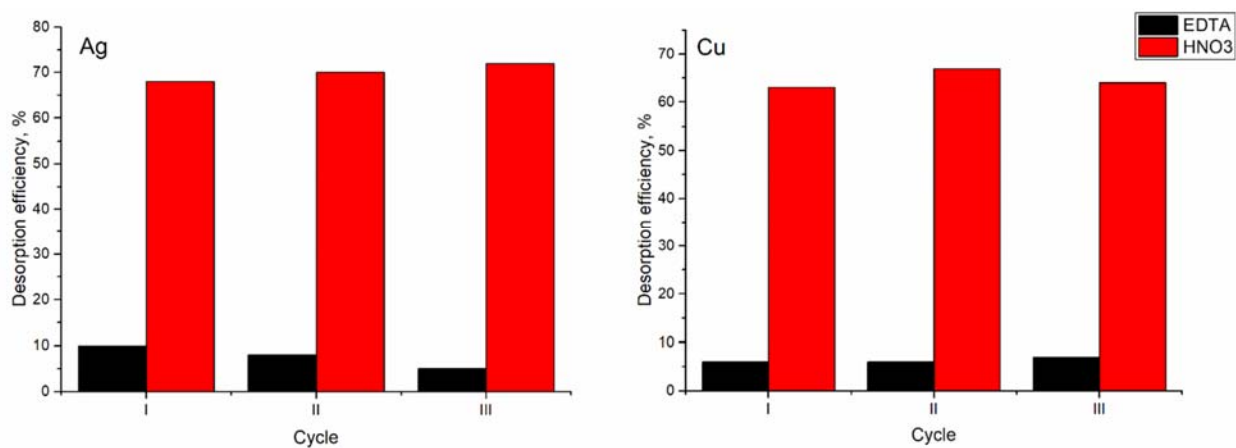

Figure S2: The efficiency of metal ions desorption using as eluents EDTA and HNO<sub>3</sub> in the Ag/Cu system.

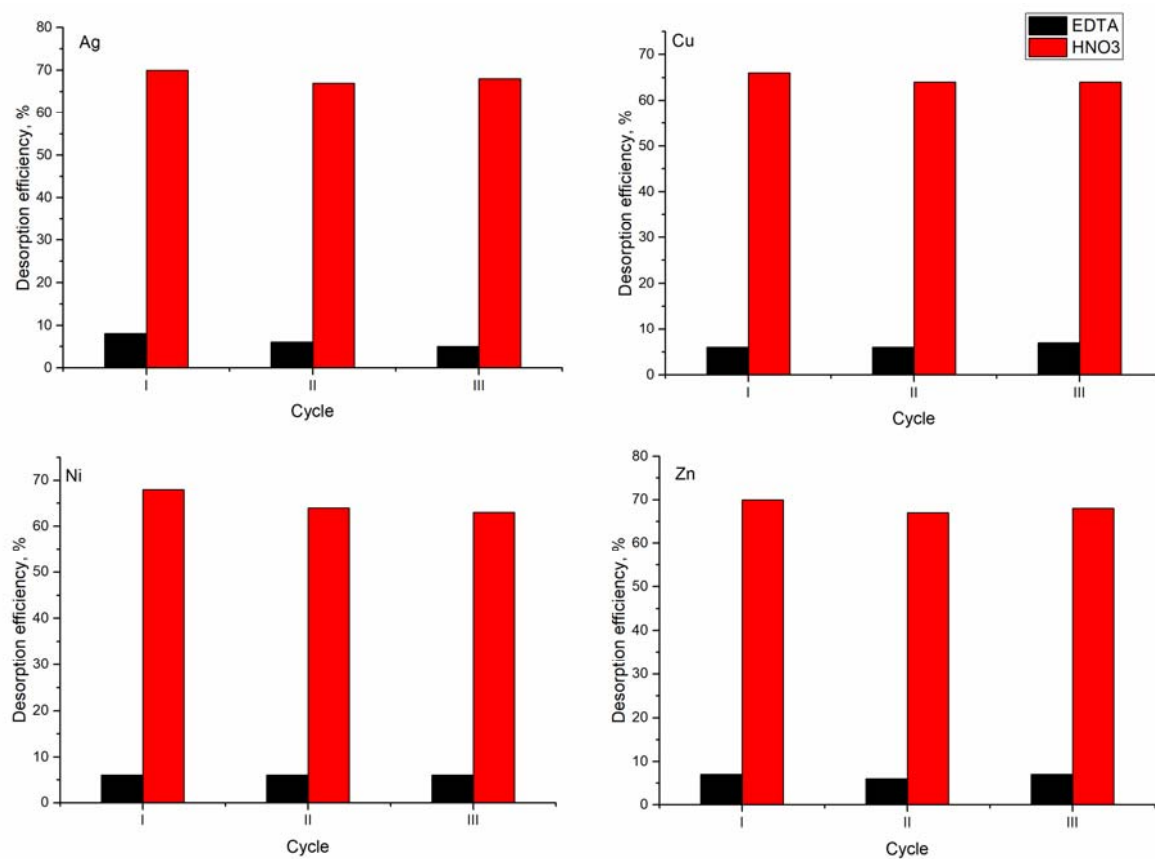

Figure S3: The efficiency of metal ion desorption using as eluents EDTA and HNO<sub>3</sub> in the Ag/Cu/Ni/Zn system.
